# Supplementary material
Source: PubMed Central journal article supplement (PMC3799888)
Supplement: NIHMS493147-supplement-Supplemental_material.pdf [file NIHMS493147-supplement-Supplemental_material.pdf]

## SUPPLEMENTAL MATERIAL

**Supplemental Table 1.** Bovine primers for real time RT-PCR

|          | Forward                  | Reverse                 |
|----------|--------------------------|-------------------------|
| P21      | AGAGCGGTGGAACCTCGACTTTGT | ACAGGTCCAAGTGGTCCTCCTGA |
| FOXO3    | GAATTCGTCAGCAACATGGGCTT  | TGGAAGGTTGCACTGGTTGAGTA |
| Bcl2     | ATGACCGAGTACCTGAACCG     | CCTTCAGAGACAGCCAGGAG    |
| survivin | TTCATCCACTGTCCCACTGA     | TAGGGTCGTCATCTGGTTCC    |
| HDAC-1   | GCCTCACCGAATCCGCATGA     | GGGCGGATGGAGCGTAAGAA    |
| cKIT     | TCCTGATTGACCTTCCTTG      | TGTCAAATCCTTGGGGAGAG    |
| MCP-1    | CGCCTGCTGCTATACATTCA     | ACACTTGCTGCTGGTGACTC    |
| SDF-1    | CTTGCCGATTCTTTGAGAGC     | CTGAAGGGAGCAGTTTGGAG    |
| IL-6     | GTGAAAGCAGCAAGGAGACA     | ATCCGTCCTTTTCCTCCATT    |
| PDGFb    | AGTGACCACTCCATCCGTTT     | TCAGCCCCGTCTTCATCTAC    |
| S100A4   | GCAAGGAGGGTGACAAGTTC     | TCGTTGTCCTTGTTCAGTC     |
| HPRT     | CTGGCTCGAGATGTGATGAA     | CAACAGGTCGGCAAAGAACT    |

## Supplemental Figures

**Figure 1.** HDAC protein expression in lung extracts from rats. (A) HDAC1, (B) HDAC2, (C) HDAC3, (D) HDAC4, (E) HDAC5, (F) HDAC7 (G) Bcl-2, (H) representative bands and (I) kidney. Rats were exposed to normal air (NC) or hypoxia for 2 days (2D), 1 week (1W) and 2 weeks (2W). The data are generated from optical density measurements of individual bands from Western blots and normalised to  $\beta$ -actin. The ratios are presented as mean  $\pm$  SEM of fold change relative to NC. n=3 in each group. Welch's ANOVA was used for (C) HDAC3 and (E) HDAC5 and standard ANOVA for the others, comparing each group with NC. \* p<0.05, \*\* p<0.001 compared with NC group.

Chronically hypoxic rat

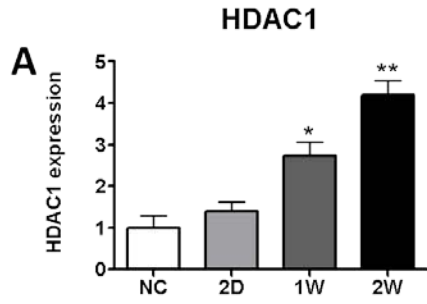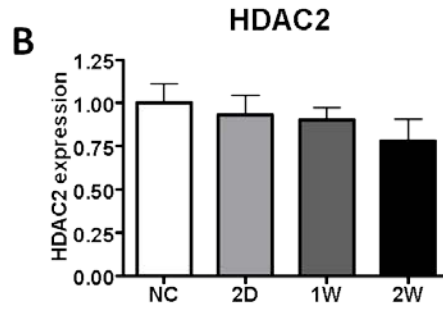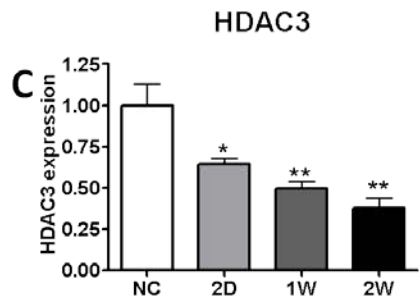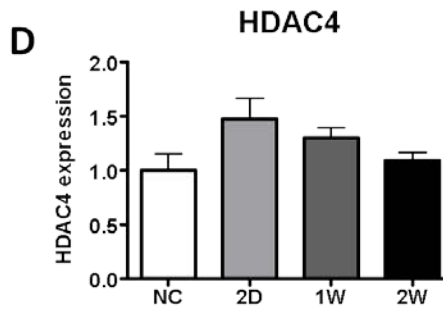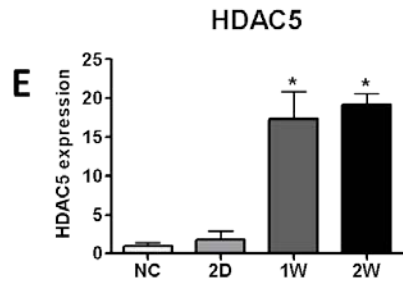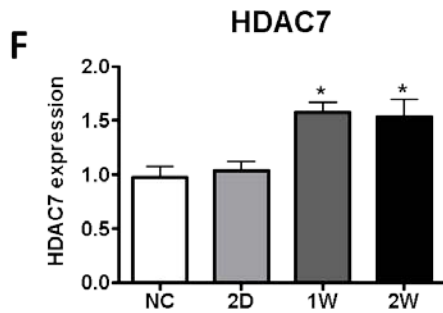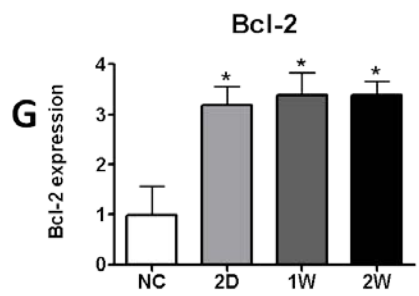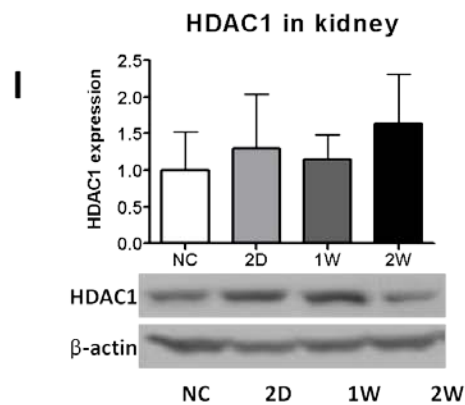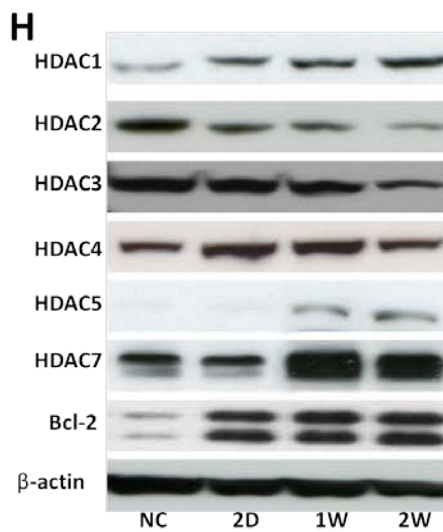

**Figure II.** Distribution of HDAC1 and HDAC5 expression in IPAH lung sections, low power view.

Bar = 25  $\mu$ m.

### IPAH patients

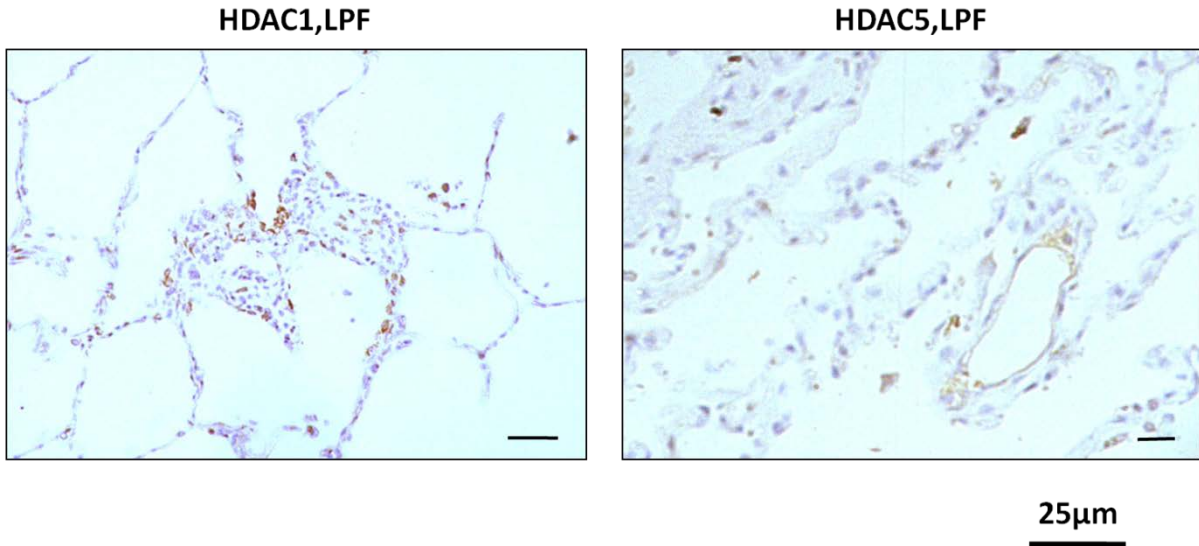

**Figure III.** Distribution of HDAC1 and HDAC5 in normoxic rat lung sections, high power view. Bar

= 25  $\mu$ m.

### Rat, normoxia control

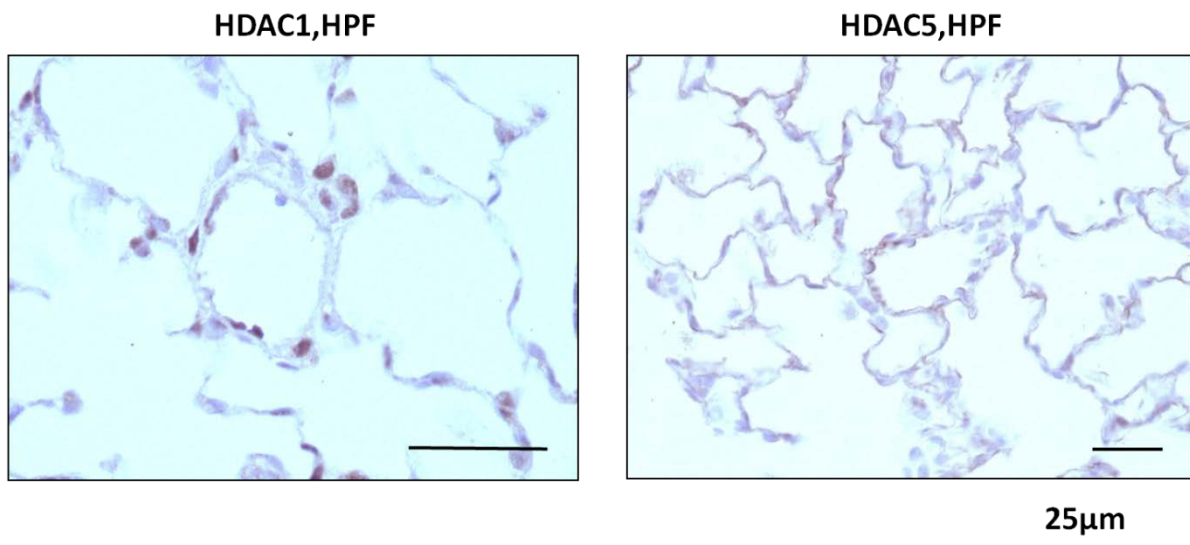

**Figure IV.** Prevention study: Valproic acid (VPA) was administered during 2 weeks hypoxia. (A) PAP, mean pulmonary artery pressure (B) RV/LV+sep, right ventricular hypertrophy, (C) SBP, systolic blood pressure, (D) percentage of muscularised vessels, (E) histology figures with van Gieson's elastic stain. NC: normoxia; HC: hypoxia for 2 weeks; low VPA: hypoxia with VPA 100 mg/kg/day; and high VPA: hypoxia with VPA 300 mg/kg/day. The data are presented as mean± SEM. n=6 in each group. \* p<0.05, \*\* p<0.001 compared with HC, ## p<0.001 compared with NC. One way standard ANOVA was used, comparing all groups pairwise. Bar = 25 µm.

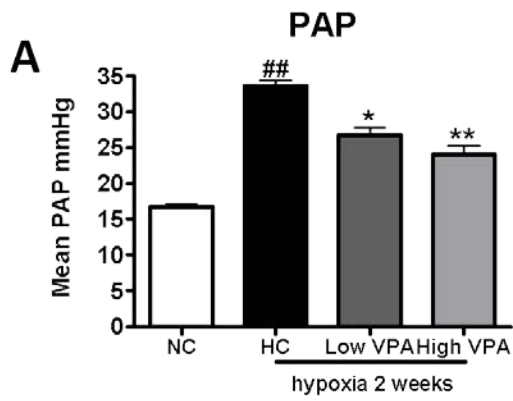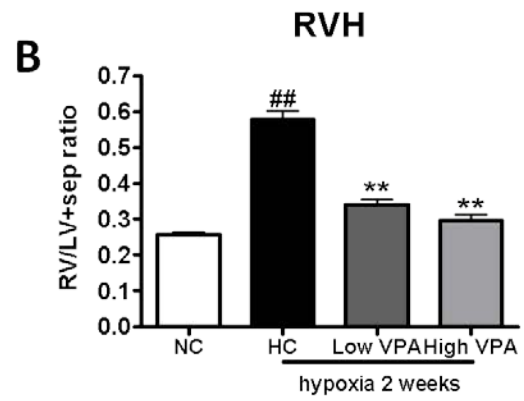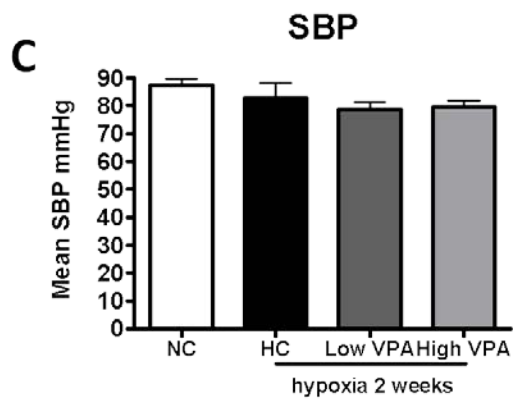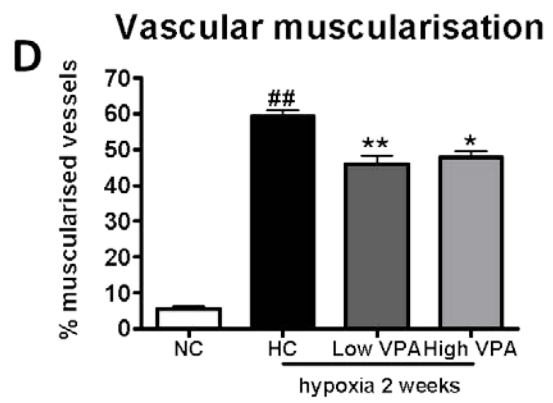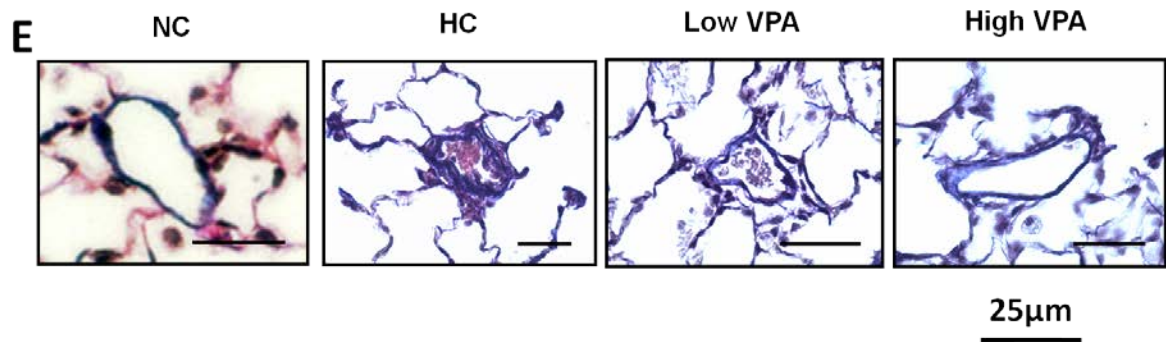

**Figure V.** HDAC1 protein levels in chronically hypoxic rat lungs. The data are generated from optical density measurements of individual bands from Western blots and normalised to  $\beta$ -actin. Data are presented as mean  $\pm$  SEM of fold change relative to 4WH. n=6. 4WH: hypoxia for 4 weeks; VPA: hypoxia with VPA 300 mg/kg/day; SAHA: hypoxia with SAHA 50 mg/kg/day. \*  $p < 0.05$  compared with 4WH. Welch's ANOVA was used, comparing each group with 4WH.

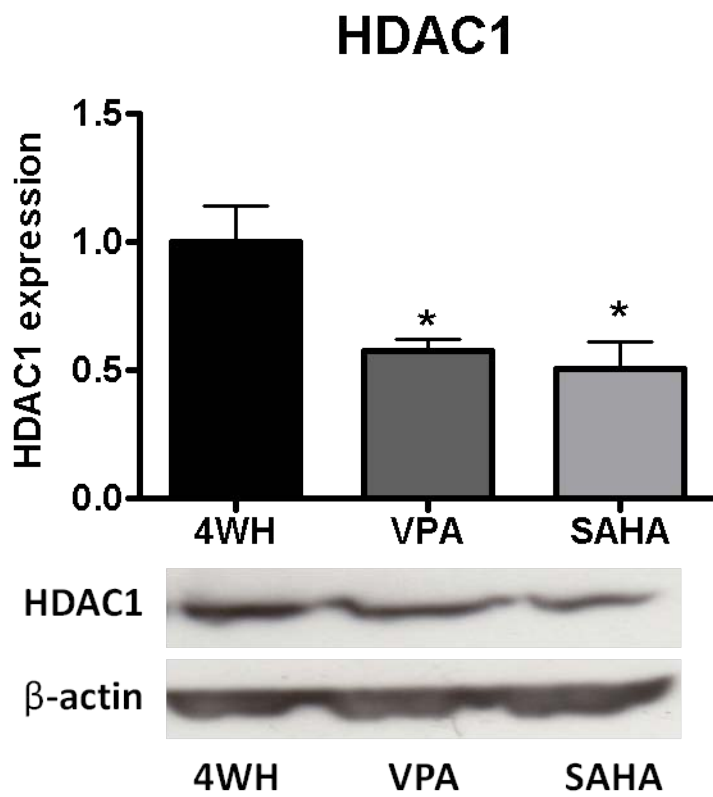

**Figure VI.** HDAC-1 mRNA levels are significantly increased in R-cells compared to CO-SMC. Data is analyzed as relative expression to HPRT and presented as mean  $\pm$  SEM. \*,  $p < 0.05$ ; compared with CO-SMC using Student's t test.

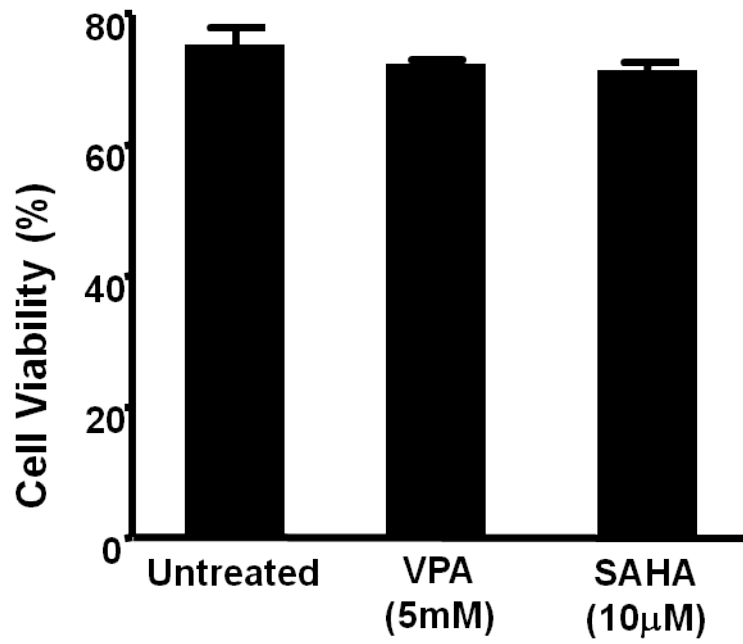



**Figure VII.** HDAC inhibitors, VPA and SAHA, do not induce significant cell death at the concentrations tested. Fibroblast cells isolated from chronically hypoxic pulmonary hypertensive calves (PH-Fibs) were treated with VPA (5mM), SAHA (10 $\mu$ M), or left untreated. Cell viability was measured by cell count using automatic cell counter. Data are presented as percentage of live cells to total cells.

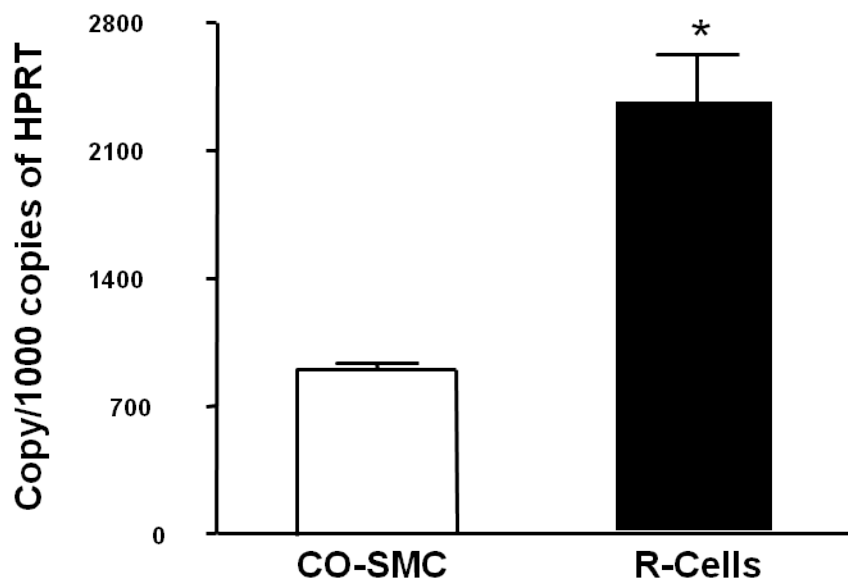

**Figure VIII.** FACS analysis of (A) viability staining with PI and (B) cell cycle distribution in PSMC stimulated with PDGF 50 $\mu$ g for 72 hours, with or without VPA or SAHA treatment. The calculations of defined areas are performed by software Cyflogic v1.2.1. Each experiment was repeated at least 3 times with separate cell preparations.

**A**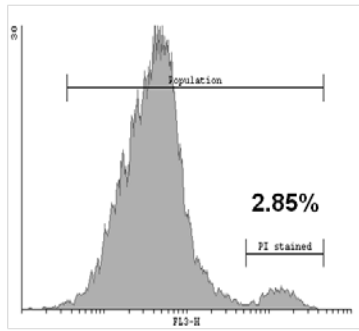**Control**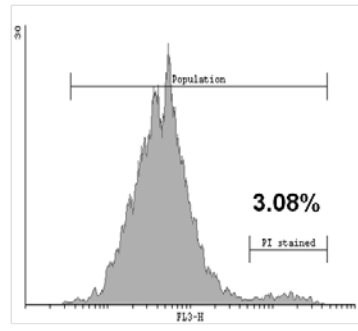**PDGF**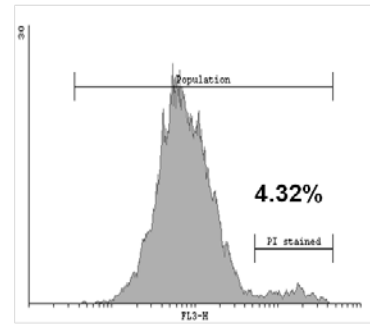**PDGF + VPA 1mM**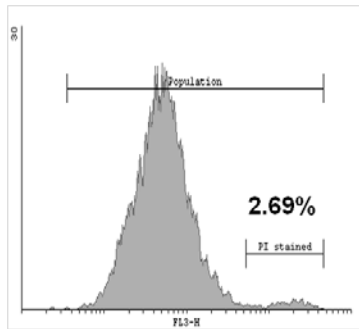**PDGF + VPA 2mM**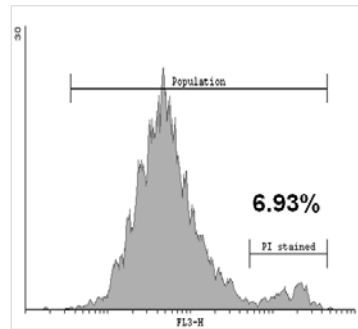**PDGF + SAHA 2.5µM**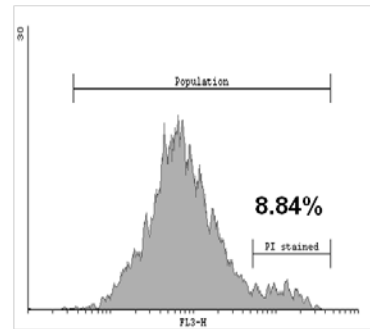**PDGF + SAHA 10µM****B**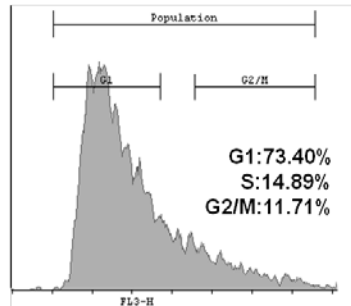**Control**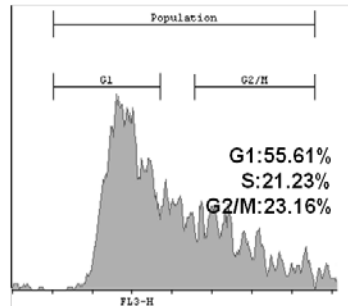**PDGF**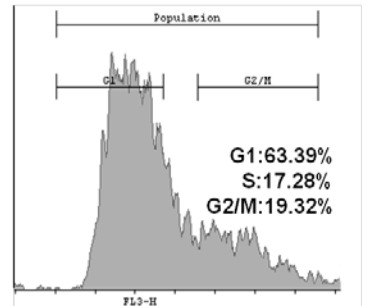**PDGF + VPA 1mM**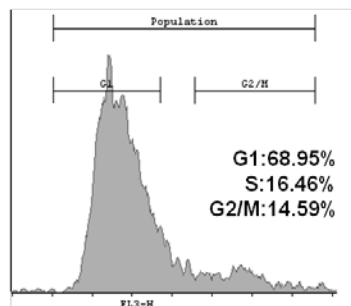**PDGF + VPA 2mM**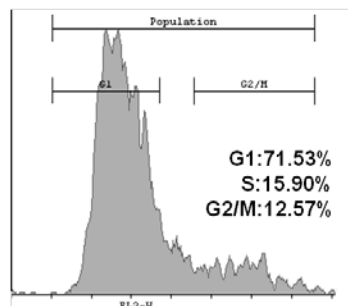**PDGF + SAHA 2.5µM**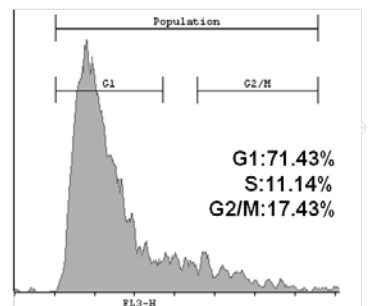**PDGF + SAHA 10µM**
